# Supplementary material for: Ecological correlates of blue whale movement behavior and its predictability in the California Current Ecosystem during the summer-fall feeding season
Source: PubMed Central journal article supplement (PMC6637557; doi:10.1186/s40462-019-0164-6), 2019-07-18
Supplement: 40462_2019_164_MOESM1_ESM.pdf [file 40462_2019_164_MOESM1_ESM.pdf]

### North Pacific Gyre Oscillation Index, 1997-2009

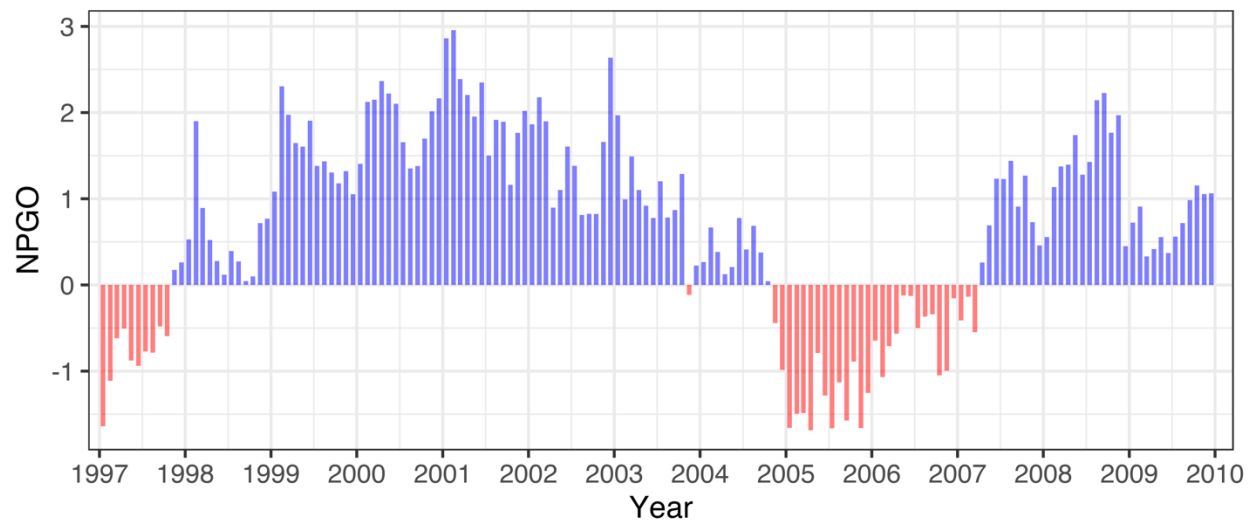

Source: <http://www.o3d.org/npgo/>

**Additional file 1: Figure S1.** Monthly values of the North Pacific Gyre Oscillation (NPGO) index for the period 1997-2009. Positive NPGO values (cool and highly productive conditions) were prevalent in most years of the study period (1998-2004 and 2007-2008), while two years (2005 and 2006) were characterized by negative NPGO values (warm conditions with reduced biological productivity).
