# Supplementary material for: Ecological correlates of blue whale movement behavior and its predictability in the California Current Ecosystem during the summer-fall feeding season
Source: PubMed Central journal article supplement (PMC6637557; doi:10.1186/s40462-019-0164-6), 2019-07-18
Supplement: 40462_2019_164_MOESM6_ESM.pdf [file 40462_2019_164_MOESM6_ESM.pdf]

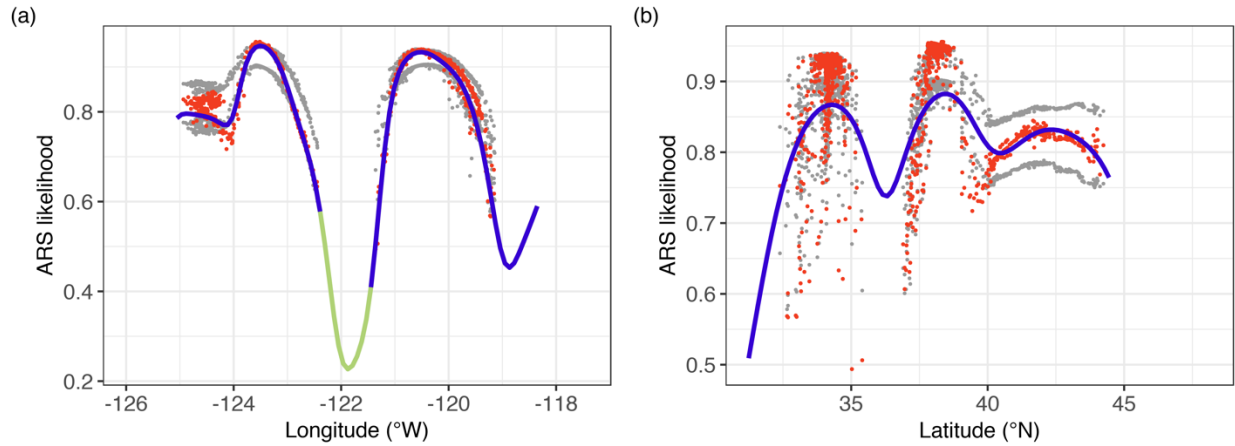

**Additional file 6: Figure S6.** The functional responses of likelihood of ARS to (a) longitude and (b) latitude in the spatial NPMR model (fitted purple curves). Also shown are the model estimates at each location (red points), and the 5<sup>th</sup> and 95<sup>th</sup> percentile variability bands obtained through 100 bootstrap samples (gray points). The green portion of the fitted curve in (a) corresponds a region of the predictor where neighborhood size was below the minimum allowed by the parsimony controls ( $n_{min} < 43.95$ ).
