# Supplementary material for: Ecological correlates of blue whale movement behavior and its predictability in the California Current Ecosystem during the summer-fall feeding season
Source: PubMed Central journal article supplement (PMC6637557; doi:10.1186/s40462-019-0164-6), 2019-07-18
Supplement: 40462_2019_164_MOESM7_ESM.pdf [file 40462_2019_164_MOESM7_ESM.pdf]

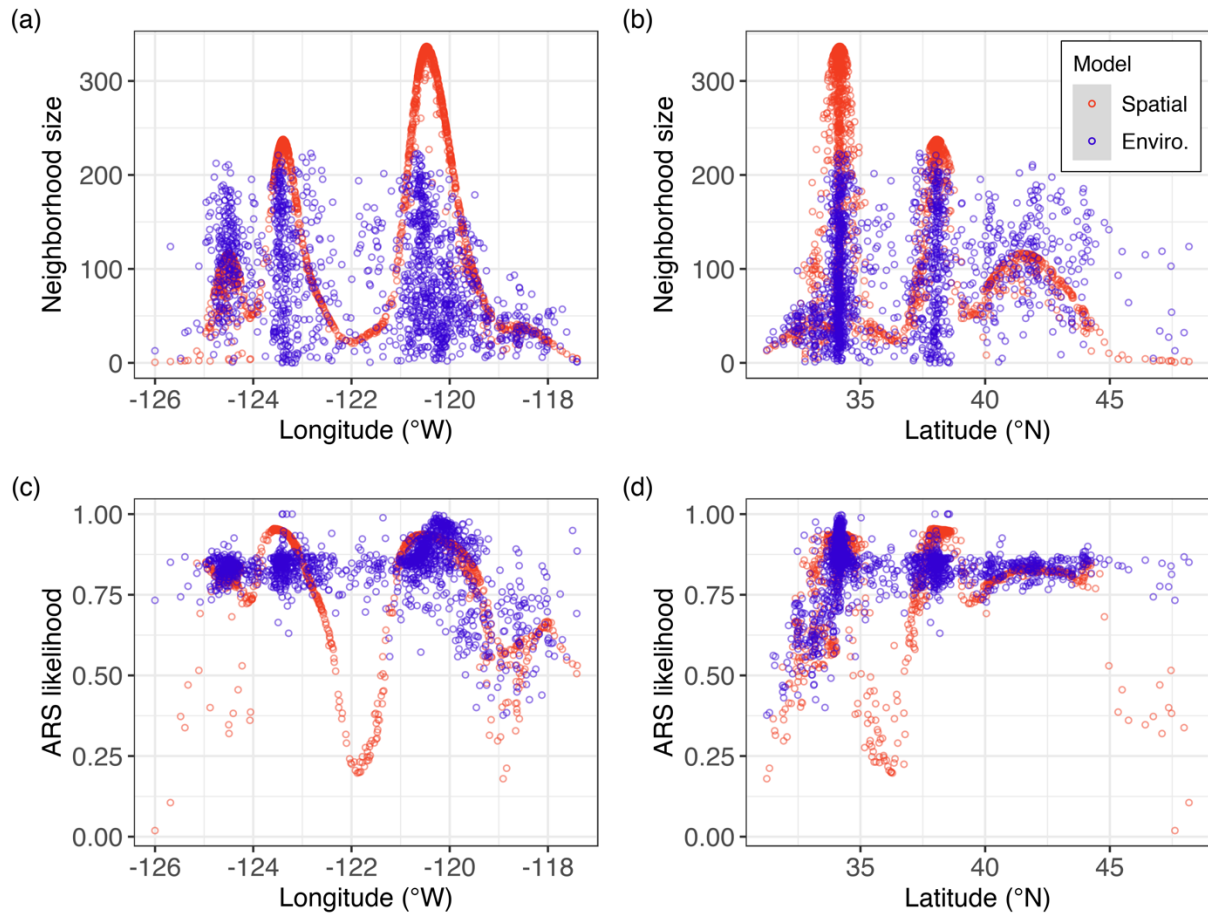

**Additional file 7: Figure S7.** Scatterplots of (a and b) neighborhood size and (c and d) likelihood of ARS as a function of longitude and latitude at each SSSM location for NPMR models based on spatial coordinates (red circles) and environmental predictors (purple circles).
